# Supplementary material for: Impact of Early Pandemic SARS-CoV-2 Lineages Replacement with the Variant of Concern P.1 (Gamma) in Western Bahia, Brazil
Source: MDPI journal article supplement (doi:10.3390/v14102314), 2022-10-21
Supplement: s1 [file s1]

**Supplementary Table S1** – Matrix with  $p$  values of comparisons (Bonferroni multiple comparison test after ANOVA) between each pair of months, regarding numbers of cases per day. Identification of months are shown in rows and columns. First, the number of the year is given and is followed by the number of the month, beginning at 1 (January) and ending at 12 (December).

## POSITIVE CASES

| Month vs month | 2020_05        | 2020_06        | 2020_07        | 2020_08        | 2020_09 | 2020_10        | 2020_11        | 2020_12        | 2021_01 | 2021_02        | 2021_03        | 2021_04        | 2021_05        | 2021_06 |
|----------------|----------------|----------------|----------------|----------------|---------|----------------|----------------|----------------|---------|----------------|----------------|----------------|----------------|---------|
| 2020_06        | <b>0.00238</b> | -              | -              | -              | -       | -              | -              | -              | -       | -              | -              | -              | -              | -       |
| 2020_07        | <b>5.6e-06</b> | <b>0.00362</b> | -              | -              | -       | -              | -              | -              | -       | -              | -              | -              | -              | -       |
| 2020_08        | <b>0.00053</b> | 0.32490        | <b>0.03592</b> | -              | -       | -              | -              | -              | -       | -              | -              | -              | -              | -       |
| 2020_09        | <b>0.00394</b> | 0.64203        | <b>0.02148</b> | 0.69679        | -       | -              | -              | -              | -       | -              | -              | -              | -              | -       |
| 2020_10        | <b>0.00023</b> | 0.03815        | 0.62740        | 0.17014        | 0.10969 | -              | -              | -              | -       | -              | -              | -              | -              | -       |
| 2020_11        | <b>0.02414</b> | 0.92858        | <b>0.01050</b> | 0.40602        | 0.65644 | 0.05961        | -              | -              | -       | -              | -              | -              | -              | -       |
| 2020_12        | 0.07625        | 0.26251        | <b>0.00066</b> | 0.06667        | 0.18390 | <b>0.00897</b> | 0.44002        | -              | -       | -              | -              | -              | -              | -       |
| 2021_01        | 0.11528        | 0.92468        | <b>0.04333</b> | 0.52679        | 0.71776 | 0.12121        | 0.97675        | 0.59767        | -       | -              | -              | -              | -              | -       |
| 2021_02        | 0.06196        | 0.47402        | <b>0.00215</b> | 0.15215        | 0.32179 | <b>0.01956</b> | 0.62181        | 0.79504        | 0.73442 | -              | -              | -              | -              | -       |
| 2021_03        | 0.43426        | 0.09808        | 0.00030        | <b>0.02605</b> | 0.07313 | <b>0.00371</b> | 0.19468        | 0.48104        | 0.33406 | 0.37915        | -              | -              | -              | -       |
| 2021_04        | <b>4.7e-05</b> | <b>0.02199</b> | 0.49858        | 0.14968        | 0.09153 | 0.90156        | <b>0.04636</b> | <b>0.00420</b> | 0.11886 | <b>0.01174</b> | <b>0.00177</b> | -              | -              | -       |
| 2021_05        | 0.00099        | 0.24736        | 0.09659        | 0.75420        | 0.52406 | 0.30179        | 0.30830        | <b>0.05890</b> | 0.42022 | 0.12116        | <b>0.02351</b> | 0.30288        | -              | -       |
| 2021_06        | <b>0.03713</b> | 0.86421        | 0.03943        | 0.64284        | 0.87568 | 0.13283        | 0.83257        | 0.38477        | 0.84310 | 0.52456        | 0.18545        | 0.12564        | 0.50488        | -       |
| 2021_07        | 0.14099        | 0.09566        | <b>0.00017</b> | <b>0.02029</b> | 0.07933 | <b>0.00350</b> | 0.25074        | 0.67508        | 0.43355 | 0.51757        | 0.69872        | <b>0.00120</b> | <b>0.02210</b> | 0.24048 |

**Supplementary Table S2** – Matrix with *p* values of comparisons (Bonferroni multiple comparison test after ANOVA) between each pair of months, regarding numbers of deaths per day. Identification of months are shown in rows and columns. First, the number of the year is given and is followed by the number of the month, beginning at 1 (January) and ending at 12 (December).

**DEATHS**

| Month vs<br>month | 2020_05        | 2020_06        | 2020_07        | 2020_08        | 2020_09        | 2020_10        | 2020_11        | 2020_12        | 2021_01        | 2021_02        | 2021_03        | 2021_04        | 2021_05        | 2021_06        |
|-------------------|----------------|----------------|----------------|----------------|----------------|----------------|----------------|----------------|----------------|----------------|----------------|----------------|----------------|----------------|
| 2020_06           | <b>0.03793</b> | -              | -              | -              | -              | -              | -              | -              | -              | -              | -              | -              | -              | -              |
| 2020_07           | <b>0.00022</b> | <b>0.00527</b> | -              | -              | -              | -              | -              | -              | -              | -              | -              | -              | -              | -              |
| 2020_08           | <b>1.3e-09</b> | <b>2.9e-07</b> | 0.10057        | -              | -              | -              | -              | -              | -              | -              | -              | -              | -              | -              |
| 2020_09           | <b>2.7e-06</b> | <b>0.00026</b> | 0.68315        | 0.16912        | -              | -              | -              | -              | -              | -              | -              | -              | -              | -              |
| 2020_10           | <b>1.2e-06</b> | <b>0.00946</b> | 0.18183        | <b>0.00015</b> | <b>0.03847</b> | -              | -              | -              | -              | -              | -              | -              | -              | -              |
| 2020_11           | <b>0.00042</b> | <b>0.07132</b> | 0.12050        | <b>0.00015</b> | <b>0.02524</b> | 0.63663        | -              | -              | -              | -              | -              | -              | -              | -              |
| 2020_12           | <b>0.00027</b> | <b>0.06459</b> | 0.11672        | <b>0.00012</b> | <b>0.02337</b> | 0.62768        | 1.00000        | -              | -              | -              | -              | -              | -              | -              |
| 2021_01           | <b>0.00011</b> | <b>0.04092</b> | 0.14641        | <b>0.00019</b> | <b>0.03211</b> | 0.76991        | 0.86369        | 0.86079        | -              | -              | -              | -              | -              | -              |
| 2021_02           | <b>0.00505</b> | <b>0.29109</b> | <b>0.04078</b> | <b>1.8e-05</b> | <b>0.00545</b> | 0.20717        | 0.48486        | 0.47601        | 0.37455        | -              | -              | -              | -              | -              |
| 2021_03           | <b>4.8e-08</b> | <b>2.9e-06</b> | 0.10523        | <b>0.91489</b> | <b>0.17481</b> | <b>0.00063</b> | <b>0.00047</b> | <b>0.00041</b> | <b>0.00060</b> | <b>7.7e-05</b> | -              | -              | -              | -              |
| 2021_04           | <b>8.7e-13</b> | <b>2.0e-12</b> | <b>9.0e-09</b> | <b>1.6e-07</b> | <b>7.7e-09</b> | <b>4.9e-11</b> | <b>2.1e-11</b> | <b>2.1e-11</b> | <b>2.8e-11</b> | <b>6.4e-12</b> | <b>4.5e-07</b> | -              | -              | -              |
| 2021_05           | <b>4.3e-12</b> | <b>1.1e-11</b> | <b>6.9e-09</b> | <b>1.3e-07</b> | <b>8.9e-09</b> | <b>1.9e-10</b> | <b>8.8e-11</b> | <b>8.9e-11</b> | <b>1.1e-10</b> | <b>3.2e-11</b> | <b>2.5e-07</b> | 0.37667        | -              | -              |
| 2021_06           | <b>8.6e-12</b> | <b>3.6e-11</b> | <b>6.1e-07</b> | <b>1.4e-05</b> | <b>5.8e-07</b> | <b>1.4e-09</b> | <b>7.3e-10</b> | <b>6.9e-10</b> | <b>9.3e-10</b> | <b>1.8e-10</b> | <b>3.7e-05</b> | 0.20137        | <b>0.04330</b> | -              |
| 2021_07           | <b>2.6e-06</b> | <b>0.00019</b> | 0.60069        | <b>0.21706</b> | <b>0.89712</b> | <b>0.02798</b> | <b>0.01850</b> | <b>0.01706</b> | <b>0.02356</b> | <b>0.00391</b> | 0.21905        | <b>1.2e-08</b> | <b>1.2e-08</b> | <b>9.0e-07</b> |

**Supplementary Table S3.** Absolute numbers of COVID-19 cases according to age group and month of study.

| Age group | 2020 |     |     |     |     |     |     |     |     |     |     | 2021 |     |     |     |
|-----------|------|-----|-----|-----|-----|-----|-----|-----|-----|-----|-----|------|-----|-----|-----|
|           | May  | Jun | Jul | Aug | Sep | Oct | Nov | Dec | Jan | Feb | Mar | Apr  | May | Jun | Jul |
| 0-11      | 0    | 4   | 2   | 12  | 9   | 13  | 2   | 1   | 2   | 5   | 3   | 4    | 21  | 14  | 15  |
| 12-18     | 6    | 5   | 11  | 18  | 10  | 18  | 16  | 10  | 3   | 18  | 11  | 43   | 47  | 38  | 36  |
| 19-29     | 20   | 76  | 97  | 105 | 88  | 86  | 102 | 48  | 44  | 64  | 39  | 122  | 151 | 134 | 73  |
| 30-44     | 41   | 102 | 202 | 191 | 135 | 181 | 137 | 90  | 50  | 124 | 106 | 225  | 284 | 238 | 138 |
| 45-59     | 12   | 60  | 102 | 94  | 105 | 109 | 89  | 46  | 51  | 67  | 69  | 160  | 234 | 183 | 71  |
| 60+       | 9    | 22  | 69  | 120 | 79  | 105 | 85  | 59  | 57  | 70  | 81  | 152  | 129 | 95  | 55  |

**Supplementary Table S4.** Absolute numbers of deaths due to COVID-19 according to age group and month of study.

| Age group | 2020 |     |     |     |     |     |     |     |     |     |     | 2021 |     |     |     |
|-----------|------|-----|-----|-----|-----|-----|-----|-----|-----|-----|-----|------|-----|-----|-----|
|           | May  | Jun | Jul | Aug | Sep | Oct | Nov | Dec | Jan | Feb | Mar | Apr  | May | Jun | Jul |
| 0-11      | 0    | 0   | 0   | 0   | 1   | 0   | 0   | 0   | 0   | 0   | 0   | 0    | 2   | 0   | 0   |
| 12-18     | 0    | 0   | 0   | 0   | 0   | 0   | 0   | 0   | 0   | 0   | 1   | 0    | 0   | 1   | 1   |
| 19-29     | 0    | 0   | 1   | 1   | 2   | 0   | 0   | 0   | 1   | 0   | 3   | 4    | 2   | 5   | 0   |
| 30-44     | 1    | 2   | 7   | 8   | 6   | 4   | 3   | 5   | 3   | 4   | 11  | 19   | 35  | 37  | 14  |
| 45-59     | 2    | 3   | 14  | 11  | 18  | 6   | 5   | 5   | 7   | 3   | 16  | 48   | 75  | 55  | 19  |
| 60+       | 0    | 10  | 32  | 67  | 44  | 41  | 38  | 36  | 40  | 29  | 58  | 115  | 96  | 64  | 33  |

**Supplementary Table S5** – Matrix with *p* values of comparisons (Bonferroni multiple comparison test after ANOVA) between each pair of months, regarding CT values. Identification of months are shown in rows and columns. First, the number of the year is given and is followed by the number of the month, beginning at 1 (January) and ending at 12 (December).

| Month vs<br>month | 2020_05         | 2020_06        | 2020_07        | 2020_08        | 2020_09 | 2020_10        | 2020_11        | 2020_12       | 2021_01 | 2021_02        | 2021_03        | 2021_04       | 2021_05       | 2021_06 |
|-------------------|-----------------|----------------|----------------|----------------|---------|----------------|----------------|---------------|---------|----------------|----------------|---------------|---------------|---------|
| 2020_06           | <b>0,00238</b>  |                |                |                |         |                |                |               |         |                |                |               |               |         |
| 2020_07           | <b>5,60E-06</b> | <b>0,00362</b> |                |                |         |                |                |               |         |                |                |               |               |         |
| 2020_08           | <b>0,00053</b>  | 0,3249         | <b>0,03592</b> |                |         |                |                |               |         |                |                |               |               |         |
| 2020_09           | <b>0,00394</b>  | 0,64203        | <b>0,02148</b> | 0,69679        |         |                |                |               |         |                |                |               |               |         |
| 2020_10           | <b>0,00023</b>  | 0,03815        | 0,6274         | 0,17014        | 0,10969 |                |                |               |         |                |                |               |               |         |
| 2020_11           | 0,02414         | 0,92858        | <b>0,0105</b>  | 0,40602        | 0,65644 | 0,05961        |                |               |         |                |                |               |               |         |
| 2020_12           | 0,07625         | 0,26251        | <b>0,00066</b> | 0,06667        | 0,1839  | <b>0,00897</b> | 0,44002        |               |         |                |                |               |               |         |
| 2021_01           | 0,11528         | 0,92468        | <b>0,04333</b> | 0,52679        | 0,71776 | 0,12121        | 0,97675        | 0,59767       |         |                |                |               |               |         |
| 2021_02           | 0,06196         | 0,47402        | <b>0,00215</b> | 0,15215        | 0,32179 | <b>0,01956</b> | 0,62181        | 0,79504       | 0,73442 |                |                |               |               |         |
| 2021_03           | 0,43426         | 0,09808        | <b>0,0003</b>  | <b>0,02605</b> | 0,07313 | <b>0,00371</b> | 0,19468        | 0,48104       | 0,33406 | 0,37915        |                |               |               |         |
| 2021_04           | <b>4,70E-05</b> | <b>0,02199</b> | 0,49858        | 0,14968        | 0,09153 | 0,90156        | <b>0,04636</b> | <b>0,0042</b> | 0,11886 | <b>0,01174</b> | <b>0,00177</b> |               |               |         |
| 2021_05           | <b>0,00099</b>  | 0,24736        | 0,09659        | 0,7542         | 0,52406 | 0,30179        | 0,3083         | 0,0589        | 0,42022 | 0,12116        | <b>0,02351</b> | 0,30288       |               |         |
| 2021_06           | 0,03713         | 0,86421        | <b>0,03943</b> | 0,64284        | 0,87568 | 0,13283        | 0,83257        | 0,38477       | 0,8431  | 0,52456        | 0,18545        | 0,12564       | 0,50488       |         |
| 2021_07           | 0,14099         | 0,09566        | <b>0,00017</b> | <b>0,02029</b> | 0,07933 | <b>0,0035</b>  | 0,25074        | 0,67508       | 0,43355 | 0,51757        | 0,69872        | <b>0,0012</b> | <b>0,0221</b> | 0,24048 |
